# Supplementary material
Source: HighWire-hosted journal article supplement (https://www.annfammed.org/highwire/filestream/7428/field_highwire_adjunct_files/0/Lucan_Supp_App.pdf)
Supplement: Lucan_Supp_App.pdf [file Lucan_Supp_App.pdf]

**Online Supplementary Material**

Lucan SC, Phillips R, Bazemore AW. Off the Roadmap? Family medicine's grant funding and committee representation at NIH. *Ann Fam Med.* 2008;6(6):534-542.

<http://www.annfammed.org/cgi/content/full/6/6/534/DC1>

| <b>Supplemental Appendix. NIH Grants Awarded to Departments of Family Medicine From 2002 to 2006, and Distributions of Family Medicine Totals by Grant Dollars</b> |                        |                        |                        |                        |                        |                                            |
|--------------------------------------------------------------------------------------------------------------------------------------------------------------------|------------------------|------------------------|------------------------|------------------------|------------------------|--------------------------------------------|
| <b>Family Medicine and NIH Totals and Percentages</b>                                                                                                              | <b>Grants<br/>2002</b> | <b>Grants<br/>2003</b> | <b>Grants<br/>2004</b> | <b>Grants<br/>2005</b> | <b>Grants<br/>2006</b> | <b>Total<br/>Grants<br/>2002-<br/>2006</b> |
| Family medicine total grant dollars received, \$ (in millions)                                                                                                     | 25.6                   | 37.9                   | 34.8                   | 43.5                   | 44.6                   | 187                                        |
| NIH total grant dollars awarded, \$ (in millions)                                                                                                                  | 16,900                 | 18,500                 | 19,700                 | 20,300                 | 20,200                 | 95,300                                     |
| % of total NIH grant dollars awarded to family medicine                                                                                                            | 0.15                   | 0.21                   | 0.18                   | 0.22                   | 0.22                   | 0.20                                       |
| Family medicine total grants received, No.                                                                                                                         | 89                     | 118                    | 131                    | 146                    | 154                    | 638                                        |
| NIH total grants awarded, No.                                                                                                                                      | 43,520                 | 46,081                 | 47,464                 | 47,345                 | 46,797                 | 231,207                                    |
| % of total NIH grants awarded to family medicine                                                                                                                   | 0.20                   | 0.26                   | 0.28                   | 0.31                   | 0.33                   | 0.28                                       |
| <b>Family medicine total No. of grant dollars</b>                                                                                                                  |                        |                        |                        |                        |                        |                                            |
| By institute or center, %                                                                                                                                          |                        |                        |                        |                        |                        |                                            |
| NCI                                                                                                                                                                | 20                     | 31                     | 27                     | 30                     | 33                     | 29                                         |
| NCCAM                                                                                                                                                              | 14                     | 13                     | 9                      | 13                     | 13                     | 12                                         |
| NHLBI                                                                                                                                                              | 7                      | 10                     | 11                     | 7                      | 9                      | 9                                          |
| NIMH                                                                                                                                                               | 5                      | 8                      | 9                      | 9                      | 7                      | 8                                          |
| NIDA                                                                                                                                                               | 15                     | 8                      | 7                      | 7                      | 6                      | 8                                          |
| NIDDK                                                                                                                                                              | 3                      | 7                      | 11                     | 9                      | 6                      | 7                                          |
| NICHD                                                                                                                                                              | 4                      | 5                      | 3                      | 3                      | 3                      | 4                                          |
| NIA                                                                                                                                                                | 9                      | 5                      | 6                      | 4                      | 4                      | 5                                          |
| NIAAA                                                                                                                                                              | 10                     | 2                      | 5                      | 5                      | 6                      | 5                                          |
| NIEHS                                                                                                                                                              | 1                      | 1                      | 2                      | 2                      | 5                      | 2                                          |
| Other <sup>a</sup>                                                                                                                                                 | 10                     | 10                     | 10                     | 10                     | 8                      | 9                                          |
| By activity code, %                                                                                                                                                |                        |                        |                        |                        |                        |                                            |
| R                                                                                                                                                                  | 76                     | 80                     | 79                     | 71                     | 69                     | 75                                         |
| K                                                                                                                                                                  | 9                      | 8                      | 12                     | 12                     | 14                     | 11                                         |
| Other <sup>b</sup>                                                                                                                                                 | 15                     | 12                     | 9                      | 17                     | 17                     | 14                                         |
| By principal investigator type, <sup>c</sup> %                                                                                                                     |                        |                        |                        |                        |                        |                                            |
| Physician                                                                                                                                                          | 51                     | 53                     | 55                     | 53                     | 47                     | 52                                         |
| Scientist                                                                                                                                                          | 35                     | 36                     | 37                     | 39                     | 44                     | 39                                         |
| Physician-scientist                                                                                                                                                | 11                     | 7                      | 8                      | 7                      | 7                      | 8                                          |
| Other                                                                                                                                                              | 3                      | 4                      | 1                      | 1                      | 2                      | 2                                          |

Continued

## Online Supplementary Data

<http://www.annfammed.org/cgi/content/full/6/6/534/DC1>

| Characteristic                                                                                                                                                                                                                                                                                                                                                                                                                                                                                                                                                                                                                                                                                                                                                                                                                                                                                                                                                                                                                                                                                                                                                                                                                                                                                                                                                                                                                                                                                                                                                                                                                                                                                                                                                                                                                                                                                                 | Grants<br>2002 | Grants<br>2003 | Grants<br>2004 | Grants<br>2005 | Grants<br>2006 | Total<br>Grants<br>2002-<br>2006 |
|----------------------------------------------------------------------------------------------------------------------------------------------------------------------------------------------------------------------------------------------------------------------------------------------------------------------------------------------------------------------------------------------------------------------------------------------------------------------------------------------------------------------------------------------------------------------------------------------------------------------------------------------------------------------------------------------------------------------------------------------------------------------------------------------------------------------------------------------------------------------------------------------------------------------------------------------------------------------------------------------------------------------------------------------------------------------------------------------------------------------------------------------------------------------------------------------------------------------------------------------------------------------------------------------------------------------------------------------------------------------------------------------------------------------------------------------------------------------------------------------------------------------------------------------------------------------------------------------------------------------------------------------------------------------------------------------------------------------------------------------------------------------------------------------------------------------------------------------------------------------------------------------------------------|----------------|----------------|----------------|----------------|----------------|----------------------------------|
| <b><i>Family medicine total No. of grant dollars (cont)</i></b>                                                                                                                                                                                                                                                                                                                                                                                                                                                                                                                                                                                                                                                                                                                                                                                                                                                                                                                                                                                                                                                                                                                                                                                                                                                                                                                                                                                                                                                                                                                                                                                                                                                                                                                                                                                                                                                |                |                |                |                |                |                                  |
| By application type, %                                                                                                                                                                                                                                                                                                                                                                                                                                                                                                                                                                                                                                                                                                                                                                                                                                                                                                                                                                                                                                                                                                                                                                                                                                                                                                                                                                                                                                                                                                                                                                                                                                                                                                                                                                                                                                                                                         |                |                |                |                |                |                                  |
| Noncompeting continuation                                                                                                                                                                                                                                                                                                                                                                                                                                                                                                                                                                                                                                                                                                                                                                                                                                                                                                                                                                                                                                                                                                                                                                                                                                                                                                                                                                                                                                                                                                                                                                                                                                                                                                                                                                                                                                                                                      | 78             | 56             | 74             | 68             | 77             | 70                               |
| New                                                                                                                                                                                                                                                                                                                                                                                                                                                                                                                                                                                                                                                                                                                                                                                                                                                                                                                                                                                                                                                                                                                                                                                                                                                                                                                                                                                                                                                                                                                                                                                                                                                                                                                                                                                                                                                                                                            | 15             | 34             | 21             | 29             | 20             | 24                               |
| Other <sup>d</sup>                                                                                                                                                                                                                                                                                                                                                                                                                                                                                                                                                                                                                                                                                                                                                                                                                                                                                                                                                                                                                                                                                                                                                                                                                                                                                                                                                                                                                                                                                                                                                                                                                                                                                                                                                                                                                                                                                             | 7              | 10             | 5              | 3              | 3              | 5                                |
| By department of family medicine, %                                                                                                                                                                                                                                                                                                                                                                                                                                                                                                                                                                                                                                                                                                                                                                                                                                                                                                                                                                                                                                                                                                                                                                                                                                                                                                                                                                                                                                                                                                                                                                                                                                                                                                                                                                                                                                                                            |                |                |                |                |                |                                  |
| Univ of California, San Diego <sup>e</sup>                                                                                                                                                                                                                                                                                                                                                                                                                                                                                                                                                                                                                                                                                                                                                                                                                                                                                                                                                                                                                                                                                                                                                                                                                                                                                                                                                                                                                                                                                                                                                                                                                                                                                                                                                                                                                                                                     | 7              | 15             | 12             | 12             | 13             | 12                               |
| Univ of Utah                                                                                                                                                                                                                                                                                                                                                                                                                                                                                                                                                                                                                                                                                                                                                                                                                                                                                                                                                                                                                                                                                                                                                                                                                                                                                                                                                                                                                                                                                                                                                                                                                                                                                                                                                                                                                                                                                                   | 5              | 9              | 4              | 5              | 10             | 7                                |
| Univ of Wisconsin                                                                                                                                                                                                                                                                                                                                                                                                                                                                                                                                                                                                                                                                                                                                                                                                                                                                                                                                                                                                                                                                                                                                                                                                                                                                                                                                                                                                                                                                                                                                                                                                                                                                                                                                                                                                                                                                                              | 10             | 3              | 6              | 5              | 5              | 5                                |
| Univ of Maryland                                                                                                                                                                                                                                                                                                                                                                                                                                                                                                                                                                                                                                                                                                                                                                                                                                                                                                                                                                                                                                                                                                                                                                                                                                                                                                                                                                                                                                                                                                                                                                                                                                                                                                                                                                                                                                                                                               | 7              | 6              | 2              | 6              | 6              | 5                                |
| Univ of Minnesota–Twin Cities                                                                                                                                                                                                                                                                                                                                                                                                                                                                                                                                                                                                                                                                                                                                                                                                                                                                                                                                                                                                                                                                                                                                                                                                                                                                                                                                                                                                                                                                                                                                                                                                                                                                                                                                                                                                                                                                                  | 6              | 6              | 6              | 3              | 5              | 5                                |
| Univ of Arizona                                                                                                                                                                                                                                                                                                                                                                                                                                                                                                                                                                                                                                                                                                                                                                                                                                                                                                                                                                                                                                                                                                                                                                                                                                                                                                                                                                                                                                                                                                                                                                                                                                                                                                                                                                                                                                                                                                | 0              | 0              | 4              | 7              | 7              | 4                                |
| Univ of California, San Francisco <sup>f</sup>                                                                                                                                                                                                                                                                                                                                                                                                                                                                                                                                                                                                                                                                                                                                                                                                                                                                                                                                                                                                                                                                                                                                                                                                                                                                                                                                                                                                                                                                                                                                                                                                                                                                                                                                                                                                                                                                 | 1              | 4              | 6              | 5              | 2              | 4                                |
| Yeshiva Univ                                                                                                                                                                                                                                                                                                                                                                                                                                                                                                                                                                                                                                                                                                                                                                                                                                                                                                                                                                                                                                                                                                                                                                                                                                                                                                                                                                                                                                                                                                                                                                                                                                                                                                                                                                                                                                                                                                   | 2              | 4              | 4              | 3              | 4              | 3                                |
| Univ of Michigan <sup>f</sup>                                                                                                                                                                                                                                                                                                                                                                                                                                                                                                                                                                                                                                                                                                                                                                                                                                                                                                                                                                                                                                                                                                                                                                                                                                                                                                                                                                                                                                                                                                                                                                                                                                                                                                                                                                                                                                                                                  | 3              | 3              | 4              | 3              | 3              | 3                                |
| Case Western <sup>e</sup>                                                                                                                                                                                                                                                                                                                                                                                                                                                                                                                                                                                                                                                                                                                                                                                                                                                                                                                                                                                                                                                                                                                                                                                                                                                                                                                                                                                                                                                                                                                                                                                                                                                                                                                                                                                                                                                                                      | 3              | 2              | 3              | 3              | 3              | 3                                |
| Other <sup>g</sup>                                                                                                                                                                                                                                                                                                                                                                                                                                                                                                                                                                                                                                                                                                                                                                                                                                                                                                                                                                                                                                                                                                                                                                                                                                                                                                                                                                                                                                                                                                                                                                                                                                                                                                                                                                                                                                                                                             | 57             | 48             | 50             | 48             | 43             | 48                               |
| <p>K = research career programs; NCCAM = National Center for Complementary and Alternative Medicine; NCI = National Cancer Institute; NHLBI = National Heart Lung and Blood Institute; NIA = National Institute on Aging; NIAAA = National Institute on Alcohol Abuse and Alcoholism; NICHD = National Institute of Child Health and Human Development; NIDA = National Institute on Drug Abuse; NIDDK = National Institute of Diabetes and Digestive and Kidney Diseases; NIEHS = National Institute of Environmental Health Sciences; NIH = National Institutes of Health; NIMH = National Institute of Mental Health; R = research projects; Univ = university.</p> <p>Note: Percentages are columns percentages and may not sum to 100% because of rounding error; only distributions for grant dollars are presented—distributions by number of grants were essentially similar and are displayed in Table 2.</p> <p><sup>a</sup> Includes 11 institutes or centers for a total of 21 institutes or centers awarding grants to departments of family medicine over the 5 years.</p> <p><sup>b</sup> Includes: U (cooperative agreements), P (research program projects and centers), T (training programs), G (resource programs), and S (research-related programs).</p> <p><sup>c</sup> Physician = medical degree (MD or DO) only, scientist = doctor of philosophy (PhD), doctor of science (ScD, DSc), or doctor of public health (DrPH) only; other = principal investigators with only bachelor's- or master's-level training, but no doctoral degrees.</p> <p><sup>d</sup> Competing continuations, supplements, and change of grantee or training institution.</p> <p><sup>e</sup> Department at a NIH top-20 institution for grant dollars.</p> <p><sup>f</sup> Department at a NIH top-10 institution for grant dollars.</p> <p><sup>g</sup> Includes 53 additional academic institutions.</p> |                |                |                |                |                |                                  |
